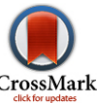

## Correction

# Correction: Combining Natural History Collections with Fisher Knowledge for Community-Based Conservation in Fiji

The *PLOS ONE* Staff

## Notice of Republication

This article was republished on June 5, 2014, to remove copyrighted information. Please download this article again to view the correct version. The originally published, uncorrected article and the republished, corrected article are provided here for reference.

## Supporting Information

**File S1.** Originally published, uncorrected article.

**File S2.** Republished corrected article.

## Reference

1. Golden AS, Naisilisili W, Ligairi I, Drew JA (2014) Combining Natural History Collections with Fisher Knowledge for Community-Based Conservation in Fiji. *PLOS ONE* 9(5): e98036. doi:10.1371/journal.pone.0098036

**Citation:** The *PLOS ONE* Staff (2014) Correction: Combining Natural History Collections with Fisher Knowledge for Community-Based Conservation in Fiji. *PLOS ONE* 9(6): e101407. doi:10.1371/journal.pone.0101407

**Published:** June 20, 2014

**Copyright:** © 2014 The *PLOS ONE* Staff. This is an open-access article distributed under the terms of the Creative Commons Attribution License, which permits unrestricted use, distribution, and reproduction in any medium, provided the original author and source are credited.
